# Supplementary material for: Effects of competitive learning tools on medical students: A case study
Source: PLOS journal article supplement (doi:10.1371/journal.pone.0194096), 2018-03-08
Supplement: S1 (10.1371/journal.pone.0194096.s001) [file journal.pone.0194096.s001]

# Survey – QUESTOURNament tool

## Part I: General information

### Gender:

Female

Male

### Age:

<19 years

19-20 years

21-22 years

> 23years

### Group:

Itinerary A

Itinerary B

Select the options that best define you as a student (**Profile**)

Competitive

Collaborative

Independent

Contributive

Do you usually attend classes? (**Level of class attendance**)

(Value yourself between 0 = nothing, and 10 = totally)

Do you usually bring the subjects up to date? (**Level of hard-working**)

(Value yourself between 0 = nothing, and 10 = totally)

What itinerary would you recommend?

- Itinerary A
- Itinerary B
- I don't know

**Part II: Students' satisfaction and motivation (only students of itinerary B)**

- 1 "Strongly Disagree"
- 2 "Moderately Disagree"
- 3 "Neutral"
- 4 "Moderately Agree"
- 5 "Strongly Agree"

|                                                                                               | 1 | 2 | 3 | 4 | 5 |
|-----------------------------------------------------------------------------------------------|---|---|---|---|---|
| I like to learn the subject through the participation in the contest                          |   |   |   |   |   |
| The contests have allowed me to deepen my knowledge and better understand the subject         |   |   |   |   |   |
| I assimilate the concepts better with this type of activities than with the traditional class |   |   |   |   |   |
| Answering to the proposed challenges gives me satisfaction                                    |   |   |   |   |   |
| The contests have been a motivation to study more                                             |   |   |   |   |   |
| This type of learning motivates me to participate more                                        |   |   |   |   |   |

|                                                                   |  |  |  |  |  |
|-------------------------------------------------------------------|--|--|--|--|--|
| actively in my learning                                           |  |  |  |  |  |
| The contests improve the quality of the learning process          |  |  |  |  |  |
| I would like other courses to integrate this activity             |  |  |  |  |  |
| This type of activities favors my relationship with my classmates |  |  |  |  |  |
| The QUESTOURnament tool is very useful                            |  |  |  |  |  |
